# Supplementary material for: Identification of trunk mutations in gastric carcinoma: a case study
Source: PubMed Central journal article supplement (PMC5520061; doi:10.1186/s12920-017-0285-y), 2017-07-17
Supplement: 12920_2017_285_MOESM3_ESM.pdf [file 12920_2017_285_MOESM3_ESM.pdf]

A

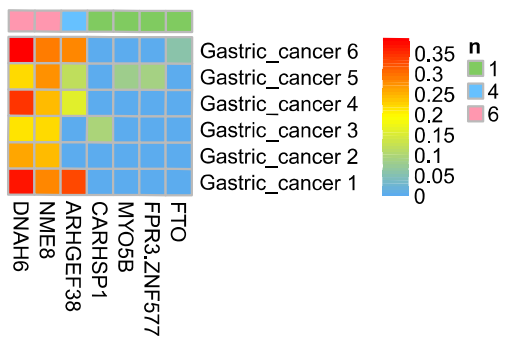

B

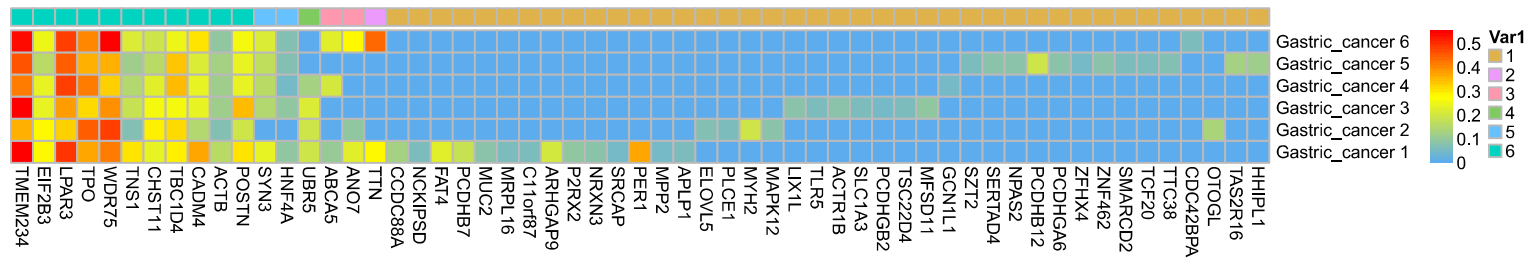

C

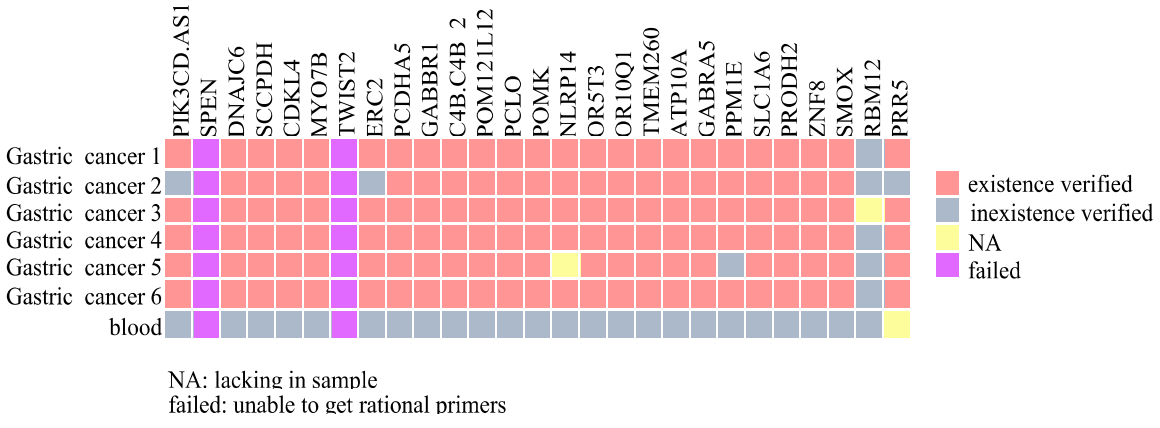

**Figure S1. Mutation frequency of stopgains and synonymous SNVs across samples, and verification of 27 trunk mutations.**  
 (A) Mutation frequency of stopgains. (B) Mutation frequency of synonymous SNVs. The color ramp shows the range of mutation frequency.  
 n & Var1: the number of samples involved in each mutation. (C) Verification of 27 nonsynonymous trunk mutations by PCR amplification and sequencing.



K

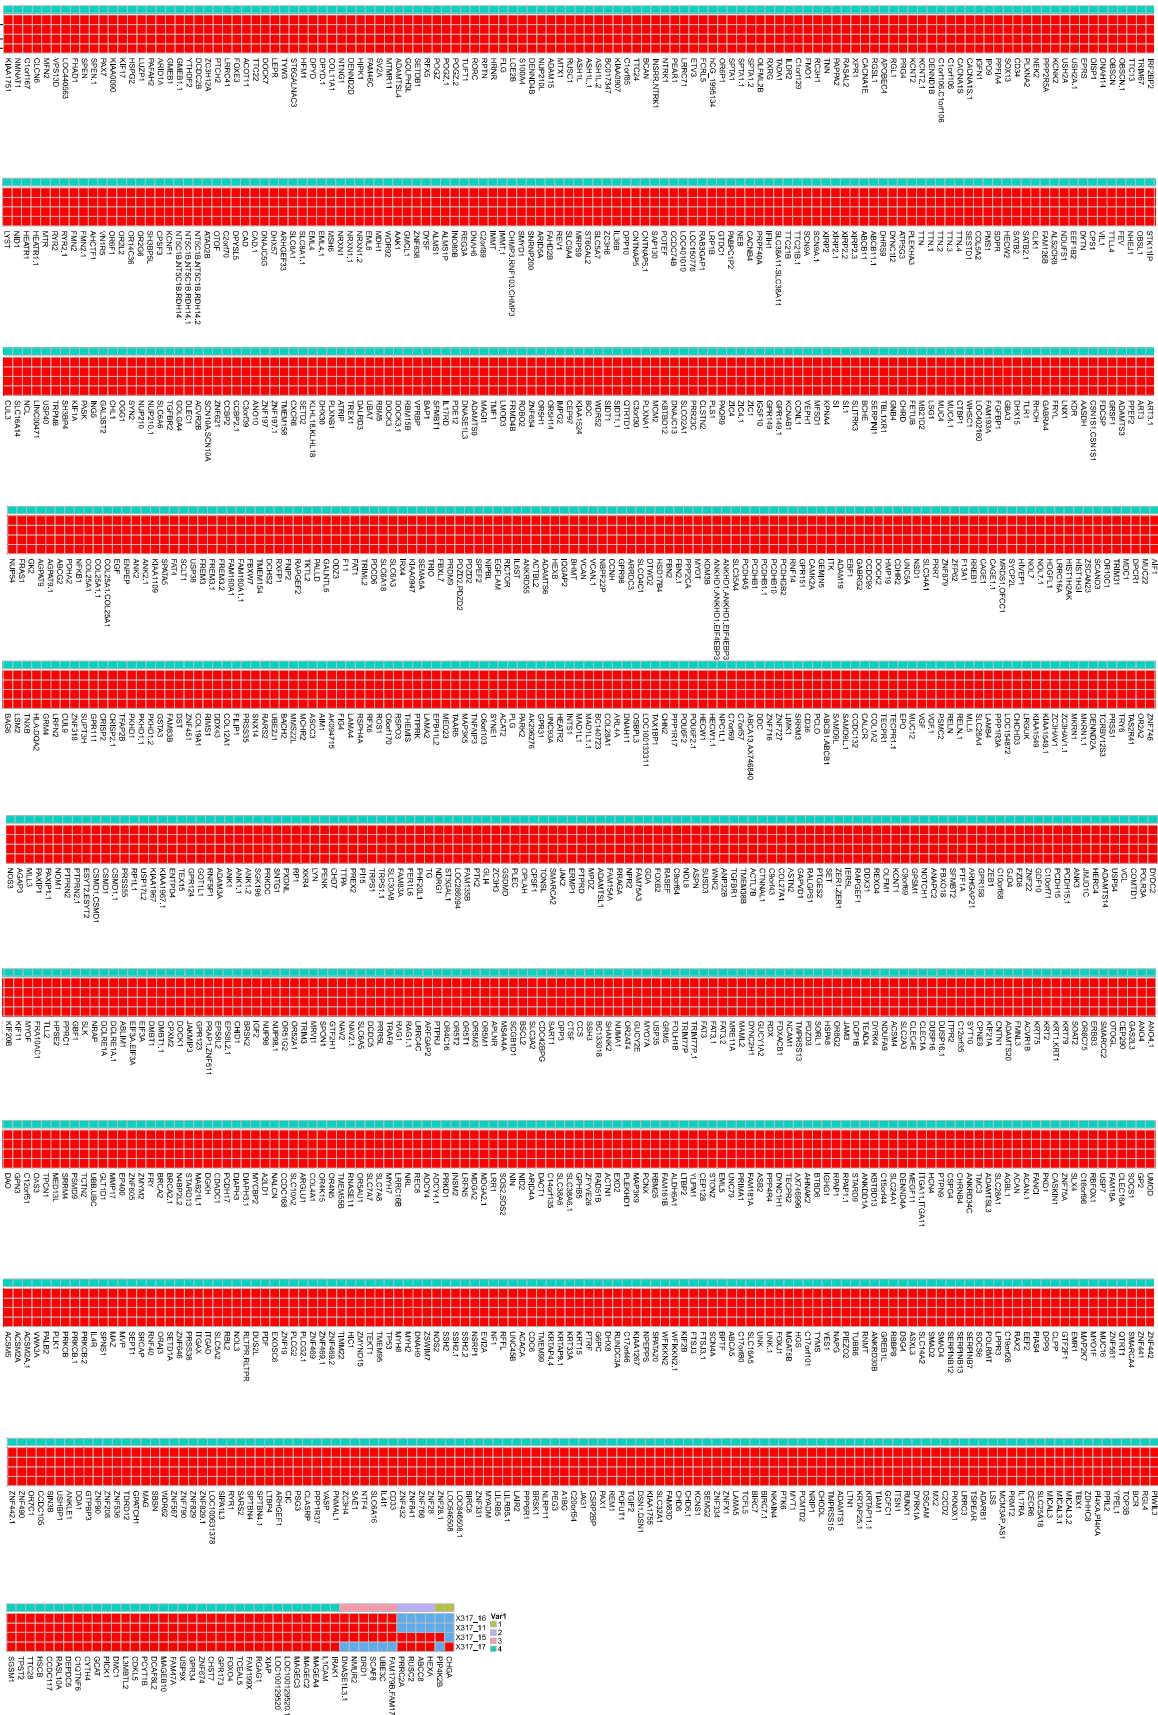

A

B

270

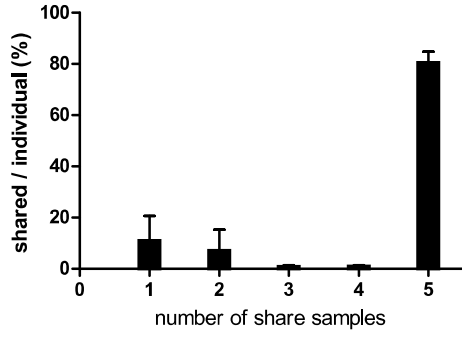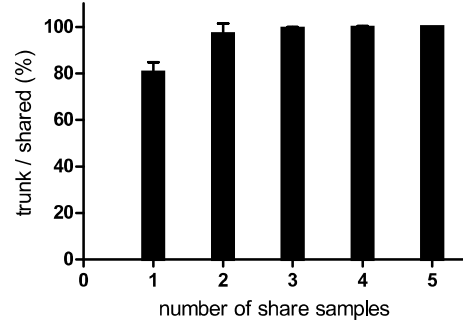

283

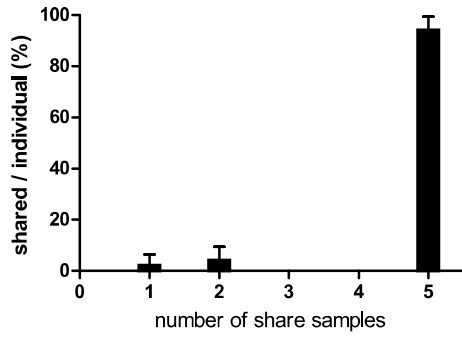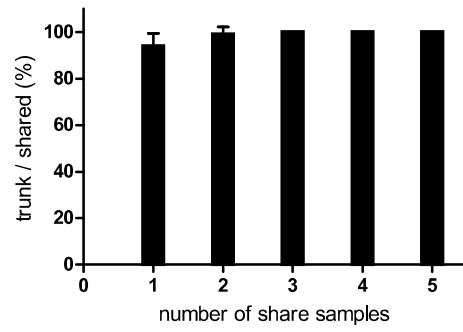

292

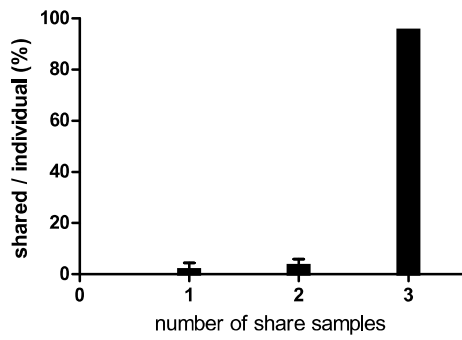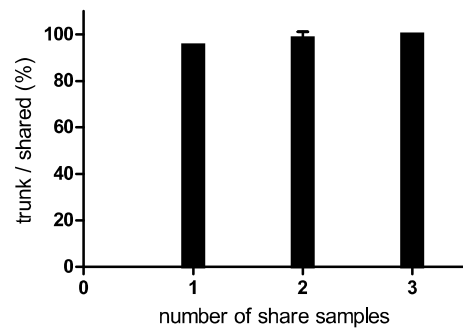

317

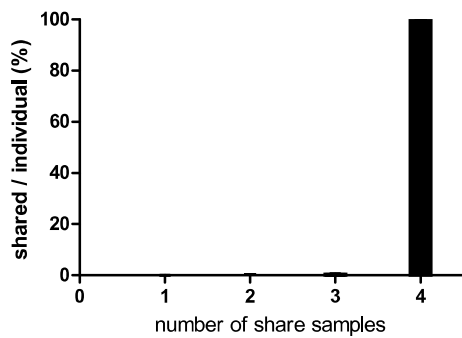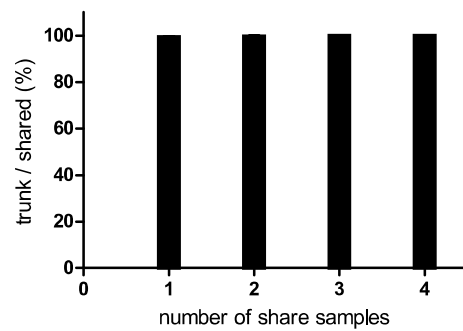

324

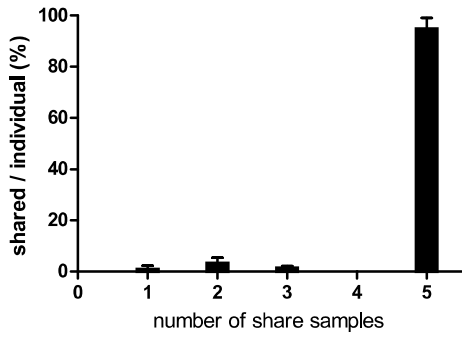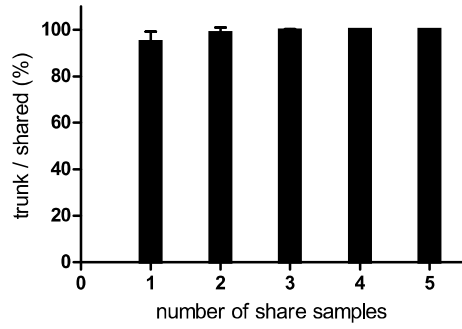

330

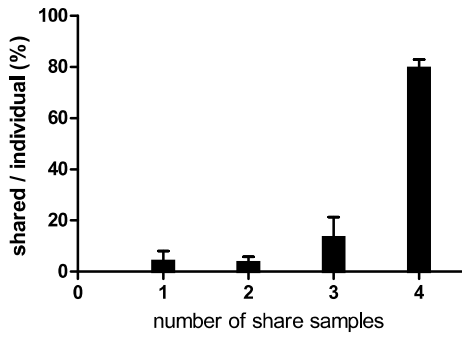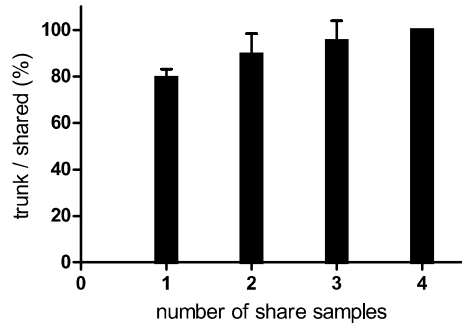

339

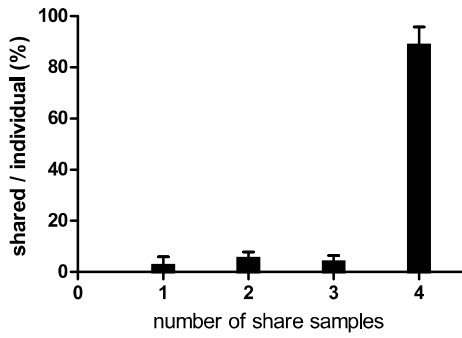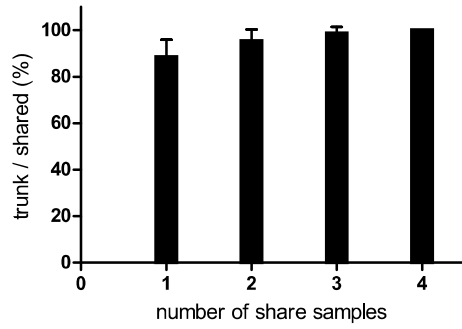

356

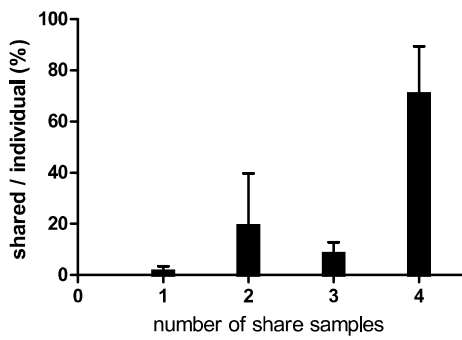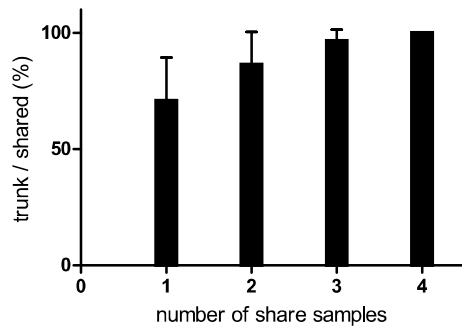

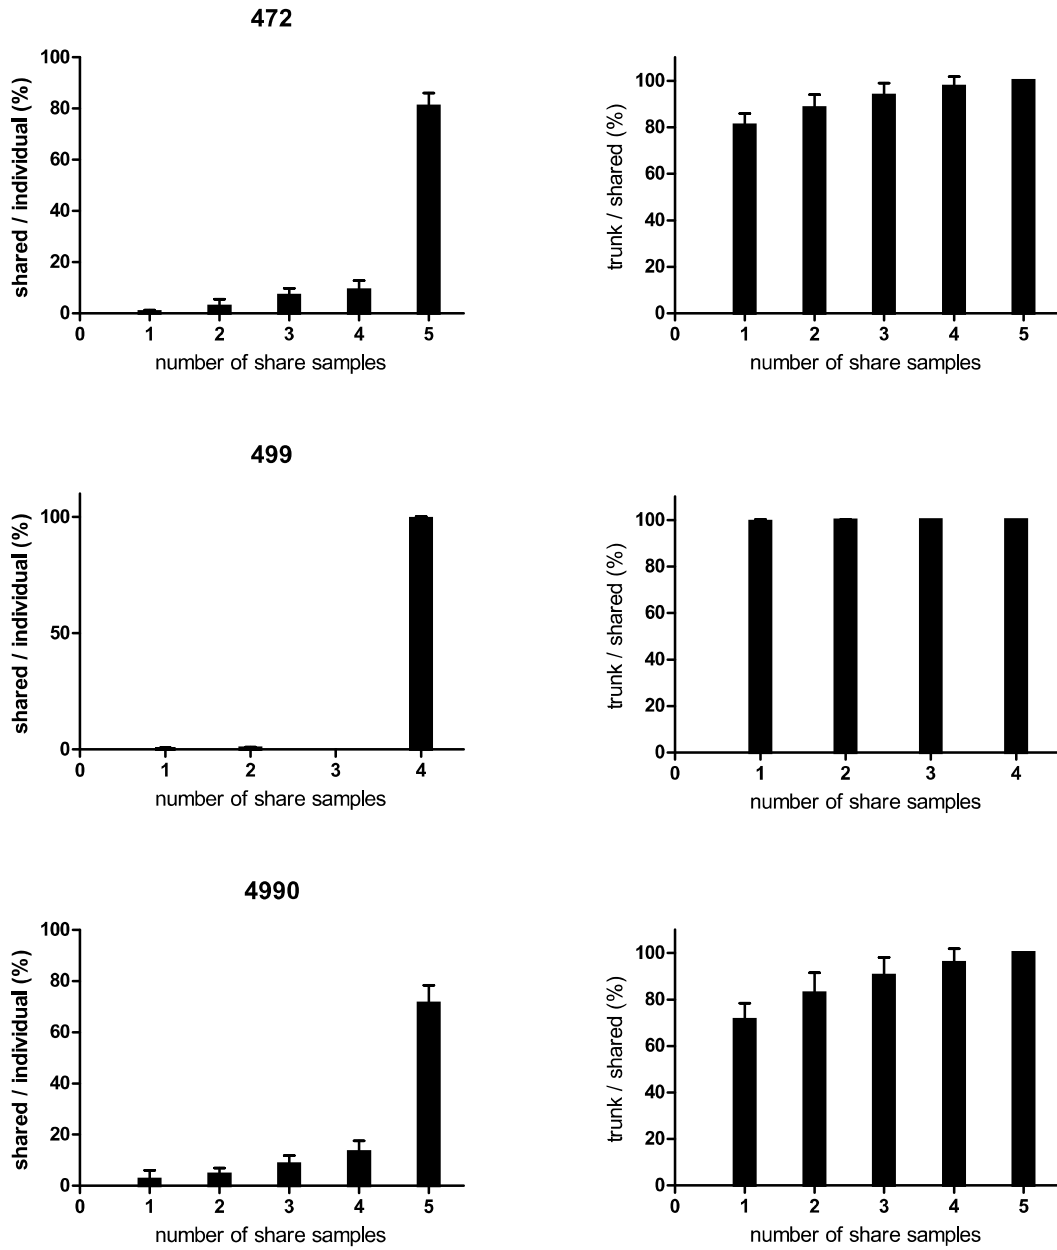

**Figure S3. Mutation proportions of lung adenocarcinomas across samples.**

Panel A shows the proportion of shared nonsynonymous mutations of any one to maximum volum of samples in respective samples, panel B shows the proportion of trunk mutations in shared mutations of any one to maximum volum of samples from each tumor. The x-axis indicate the volum of samples to give shared mutations.
